# Supplementary material
Source: publisher figshare collection journal article supplement (https://acs.figshare.com/ndownloader/files/5546390)
Supplement: Supplementary file 1 [file 5546390]

**Supporting Information**

**Electrochemical Rectification of Redox Mediators Using  
Porphyrin-Based Molecular Multilayered Films on ITO  
Electrodes**

*Marissa R. Civic and Peter H. Dinolfo\**

Department of Chemistry and Chemical Biology, Rensselaer Polytechnic Institute, 125  
Cogswell, 110 8<sup>th</sup> Street, Troy, NY 12180, USA

\*Corresponding author. E-mail: *dinolp@rpi.edu*

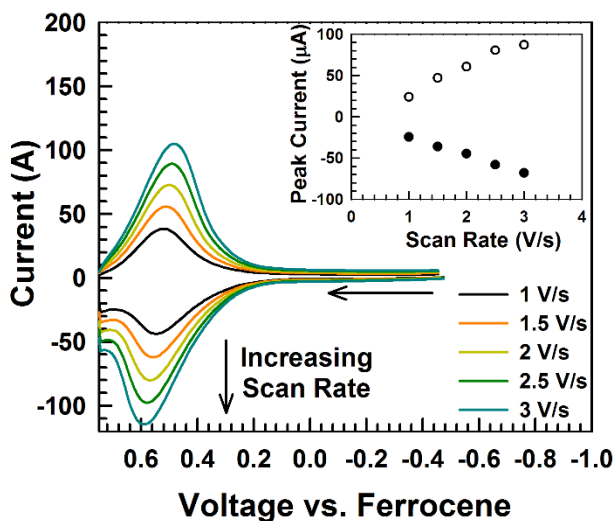

Figure S1. CVs of **ZnTPEP<sub>4</sub>** film on ITO taken at a different scan rates. Inset includes peak current height as a function of scan rate for anodic (filled dots) and cathodic (unfilled dots) peaks of ZnTPEP's first oxidation.

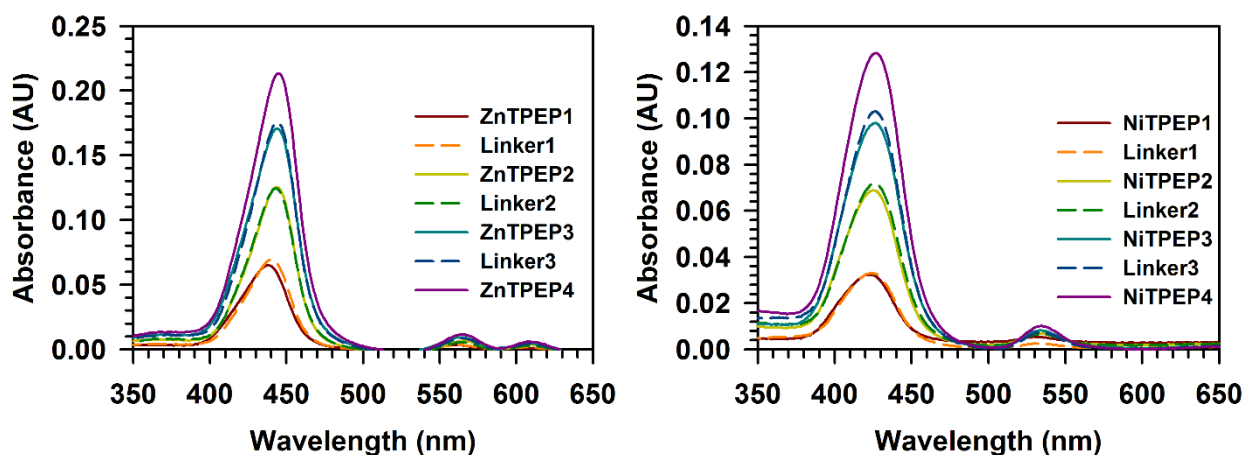

| Layer                     | molecules / cm <sup>2</sup> | Layer                     | molecules / cm <sup>2</sup> |
|---------------------------|-----------------------------|---------------------------|-----------------------------|
| <b>ZnTPEP<sub>1</sub></b> | 5.74 x 10 <sup>13</sup>     | <b>NiTPEP<sub>1</sub></b> | 8.53 x 10 <sup>13</sup>     |
| <b>ZnTPEP<sub>2</sub></b> | 1.28 x 10 <sup>14</sup>     | <b>NiTPEP<sub>2</sub></b> | 2.01 x 10 <sup>14</sup>     |
| <b>ZnTPEP<sub>3</sub></b> | 2.10 x 10 <sup>14</sup>     | <b>NiTPEP<sub>3</sub></b> | 3.29 x 10 <sup>14</sup>     |
| <b>ZnTPEP<sub>4</sub></b> | 3.18 x 10 <sup>14</sup>     | <b>NiTPEP<sub>4</sub></b> | 4.12 x 10 <sup>14</sup>     |

Figure S2. *Top*: UV-visible absorption data obtained during the grown of **ZnTPEP** (left) and **NiTPEP** (right) multilayer films on ITO. *Bottom*: Table of surface coverages obtained from integration of **ZnTPEP** and **NiTPEP** CVs.

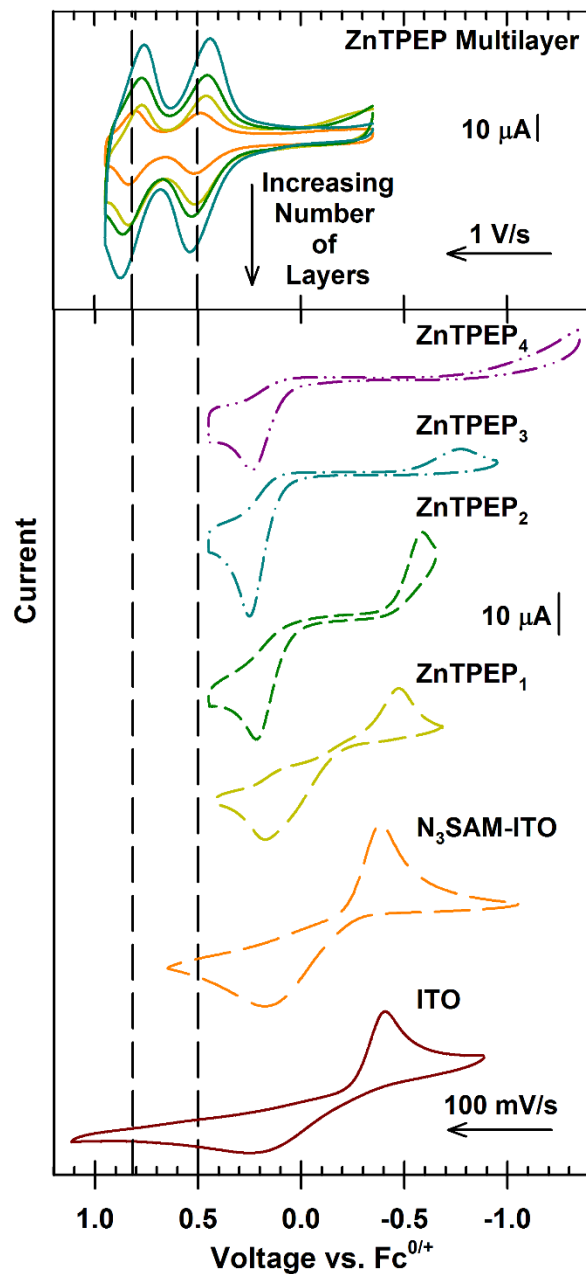

Figure S3. *Top:* CVs of one through four layers of **ZnTPEP** on ITO. *Bottom:* CVs of a 1 mM solution  $[\text{Co}(\text{dmb})_3]^{2+}$  at a clean ITO electrode (solid red line), SAM-functionalized ITO (long dashed orange), and one (dashed yellow), two (short dashed green), three (dash-dot cyan), and four (purple dash-dot-dot) layers of **ZnTPEP** on ITO. The vertical dashed black lines are located at the **ZnTPEP**<sup>0/+</sup> and **ZnTPEP**<sup>+2/+</sup> potentials.

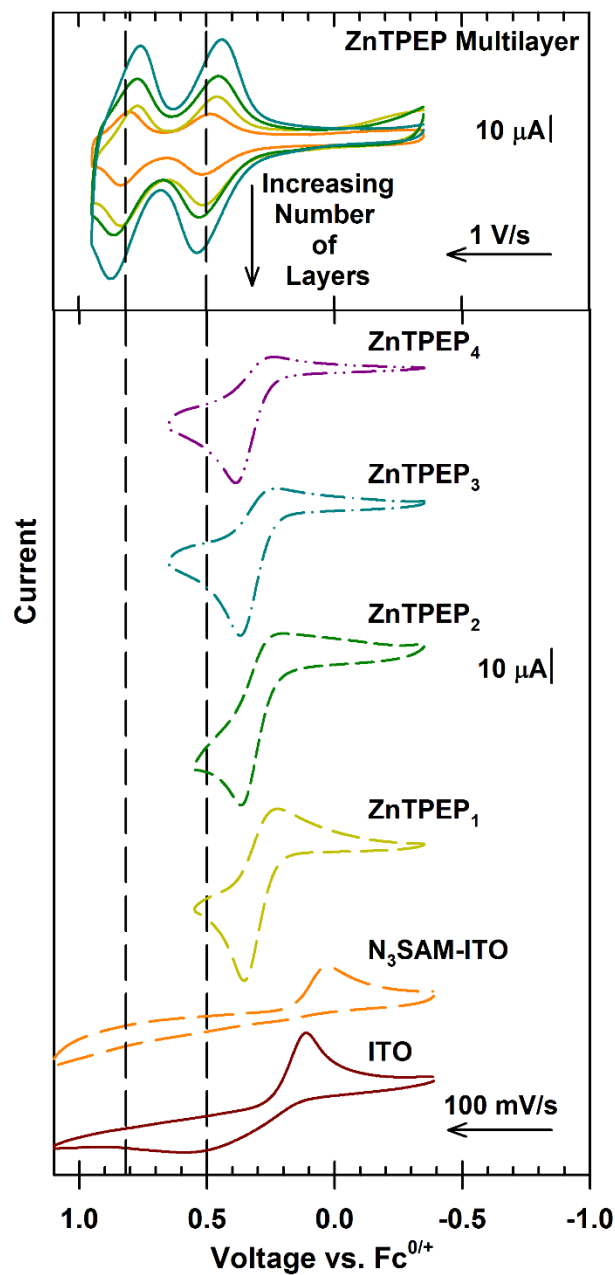

Figure S4. *Top*: CVs of one through four layers of **ZnTPEP** on ITO. *Bottom*: CVs of a 1 mM solution  $[\text{Co}(\text{NO}_2\text{-phen})_3]^{2+}$  at a clean ITO electrode (solid red line), SAM-functionalized ITO (long dashed orange), and one (dashed yellow), two (short dashed green), three (dash-dot cyan), and four (purple dash-dot-dot) layers of **ZnTPEP** on ITO. The vertical dashed black lines are located at the  $\text{ZnTPEP}^{0/+}$  and  $\text{ZnTPEP}^{+/2+}$  potentials.

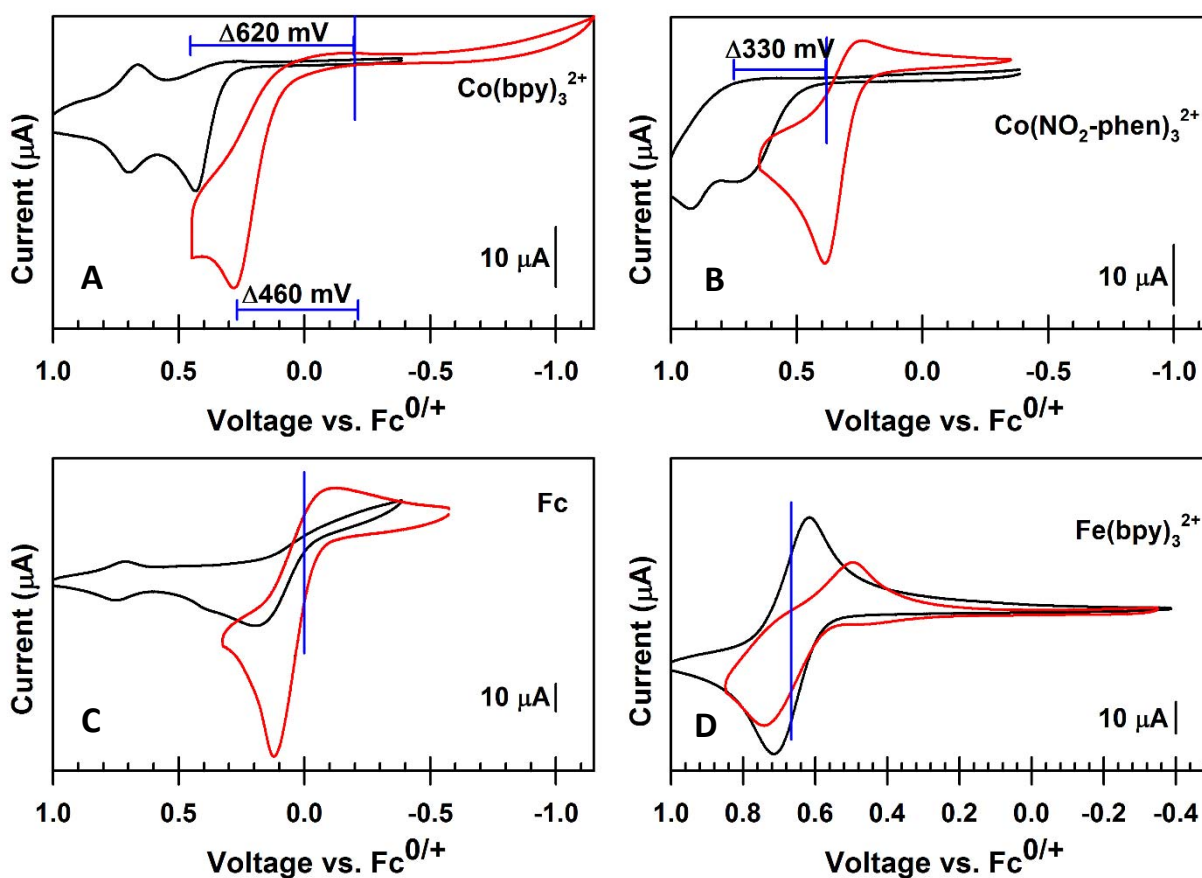

Figure S5. Comparison of redox mediator CVs over four layers of **ZnTPEP** (red lines) and **NiTPEP** (black lines) on an ITO electrode. All mediators are 1 mM: (A)  $[\text{Co}(\text{bpy})_3]^{2+}$ , (B)  $[\text{Co}(\text{NO}_2\text{-phen})_3]^{2+}$ , (C)  $\text{Fc}$ , and (D)  $[\text{Fe}(\text{bpy})_3]^{2+}$ .

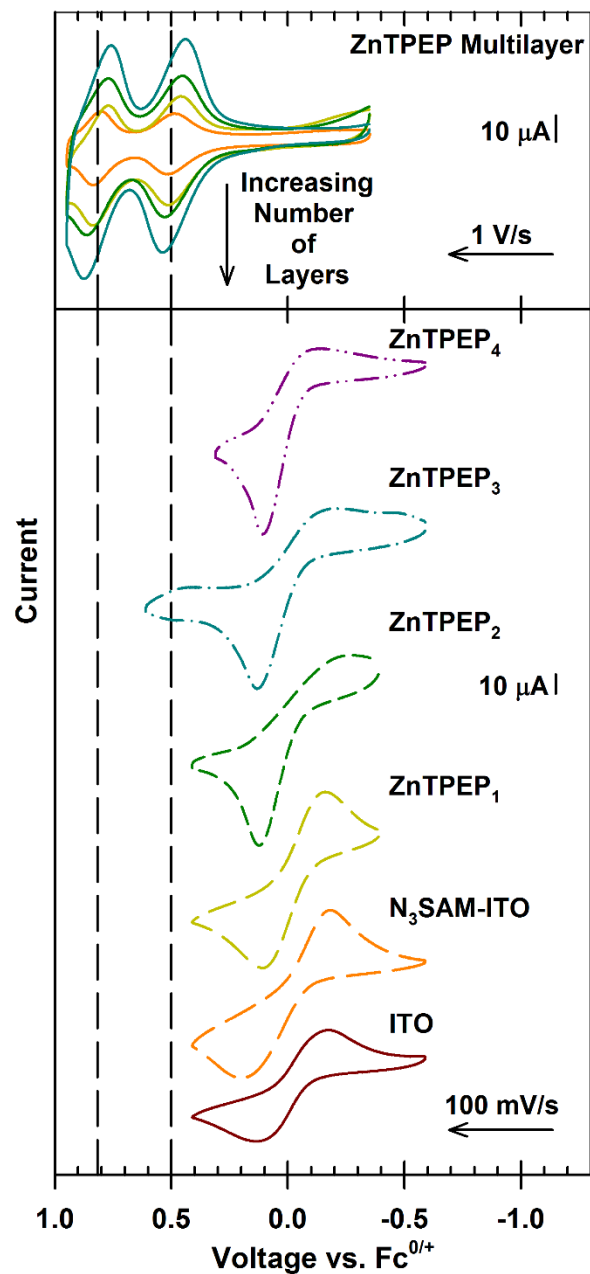

Figure S6. *Top:* CVs of one through four layers of **ZnTPEP** on ITO. *Bottom:* CVs of a  $1 \text{ mM}$  solution Fc at a clean ITO electrode (solid red line), SAM-functionalized ITO (long dashed orange), and one (dashed yellow), two (short dashed green), three (dash-dot cyan), and four (purple dash-dot-dot) layers of **ZnTPEP** on ITO. The vertical dashed black lines are located at the  $\text{ZnTPEP}^{0/+}$  and  $\text{ZnTPEP}^{+/2+}$  potentials.

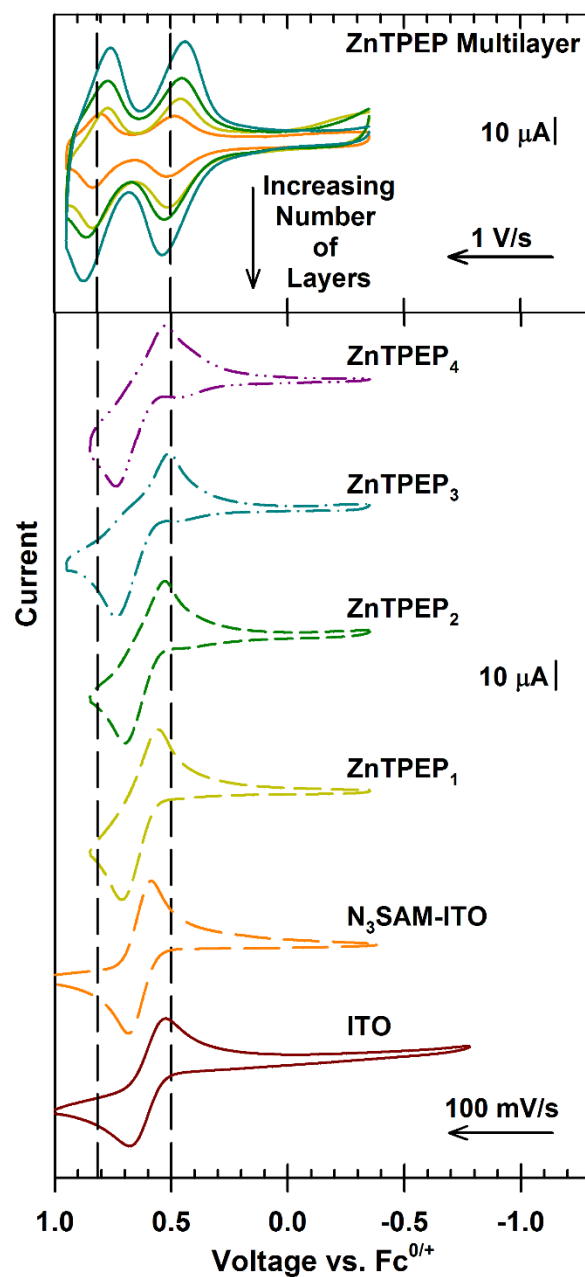

Figure S7. *Top:* CVs of one through four layers of **ZnTPEP** on ITO. *Bottom:* CVs of a 1 mM solution  $[\text{Fe}(\text{bpy})_3]^{2+}$  at a clean ITO electrode (solid red line), SAM-functionalized ITO (long dashed orange), and one (dashed yellow), two (short dashed green), three (dash-dot cyan), and four (purple dash-dot-dot) layers of **ZnTPEP** on ITO. The vertical dashed black lines are located at the **ZnTPEP**<sup>0/+</sup> and **ZnTPEP**<sup>+/2+</sup> potentials.

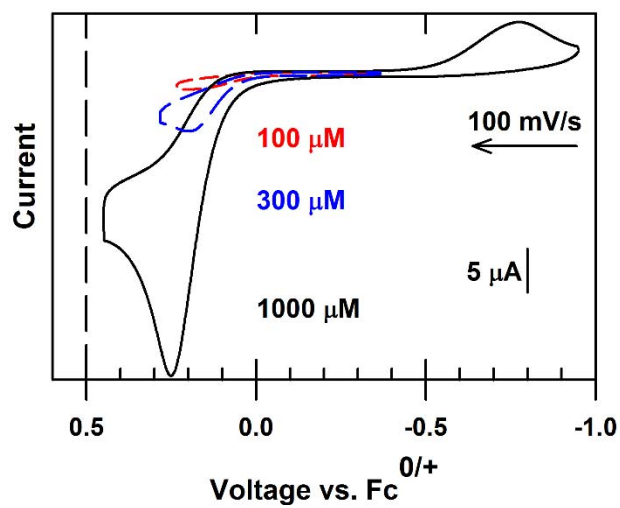

Figure S8. CVs of  $[\text{Co}(\text{dmb})_3]^{2+}$  over a film of three layers of **ZnTPEP** on ITO. Black solid line, blue long dash, and red medium dash are 1000, 300, and 100  $\mu\text{M}$  respectively. The dashed black line at 0.5 V corresponds to the midpoint potential of **ZnTPEP**<sup>0/+</sup>.



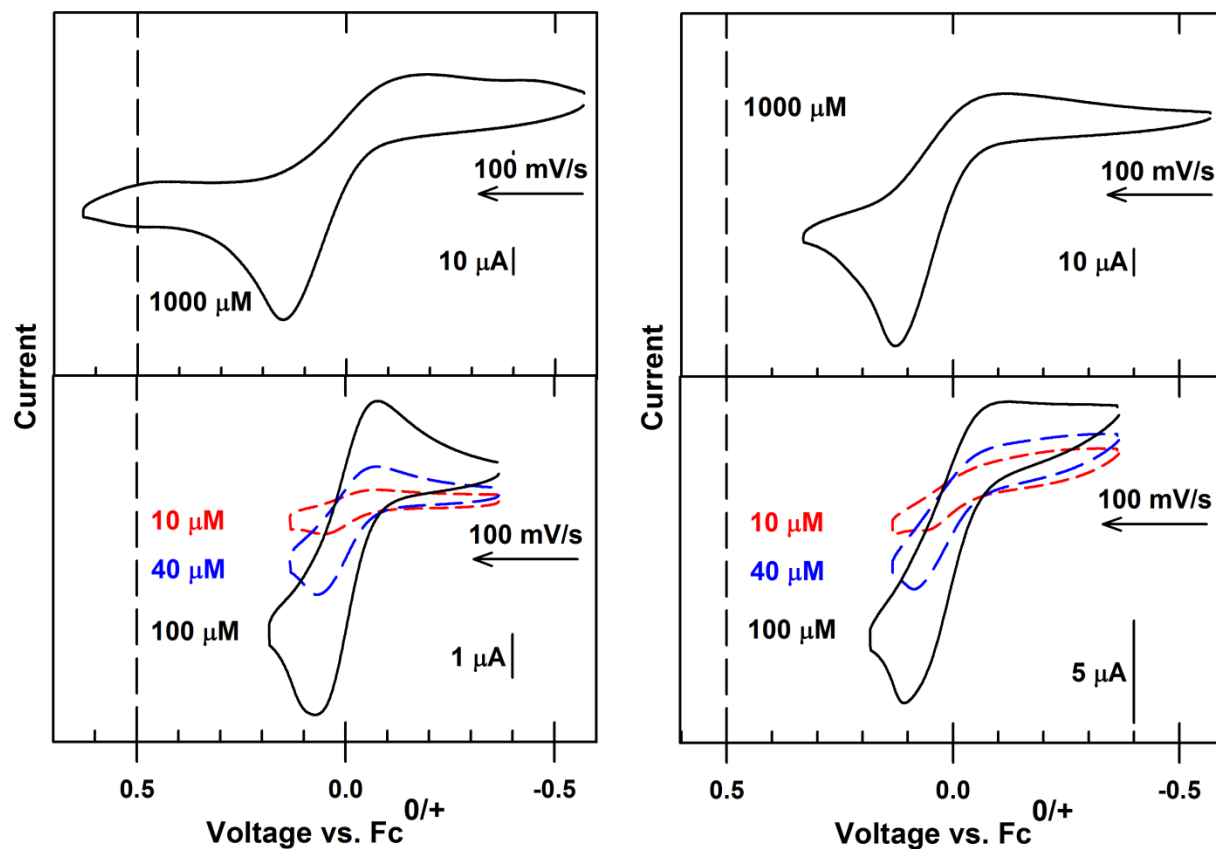

Figure S9. CVs of Fc over a film of three (left) and four (right) layers of **ZnTPEP** on ITO. The vertical dashed black line at 0.5 V corresponds to the midpoint potential of **ZnTPEP**<sup>0/+</sup>.

Three layers of **ZnTPEP**Four layers of **ZnTPEP**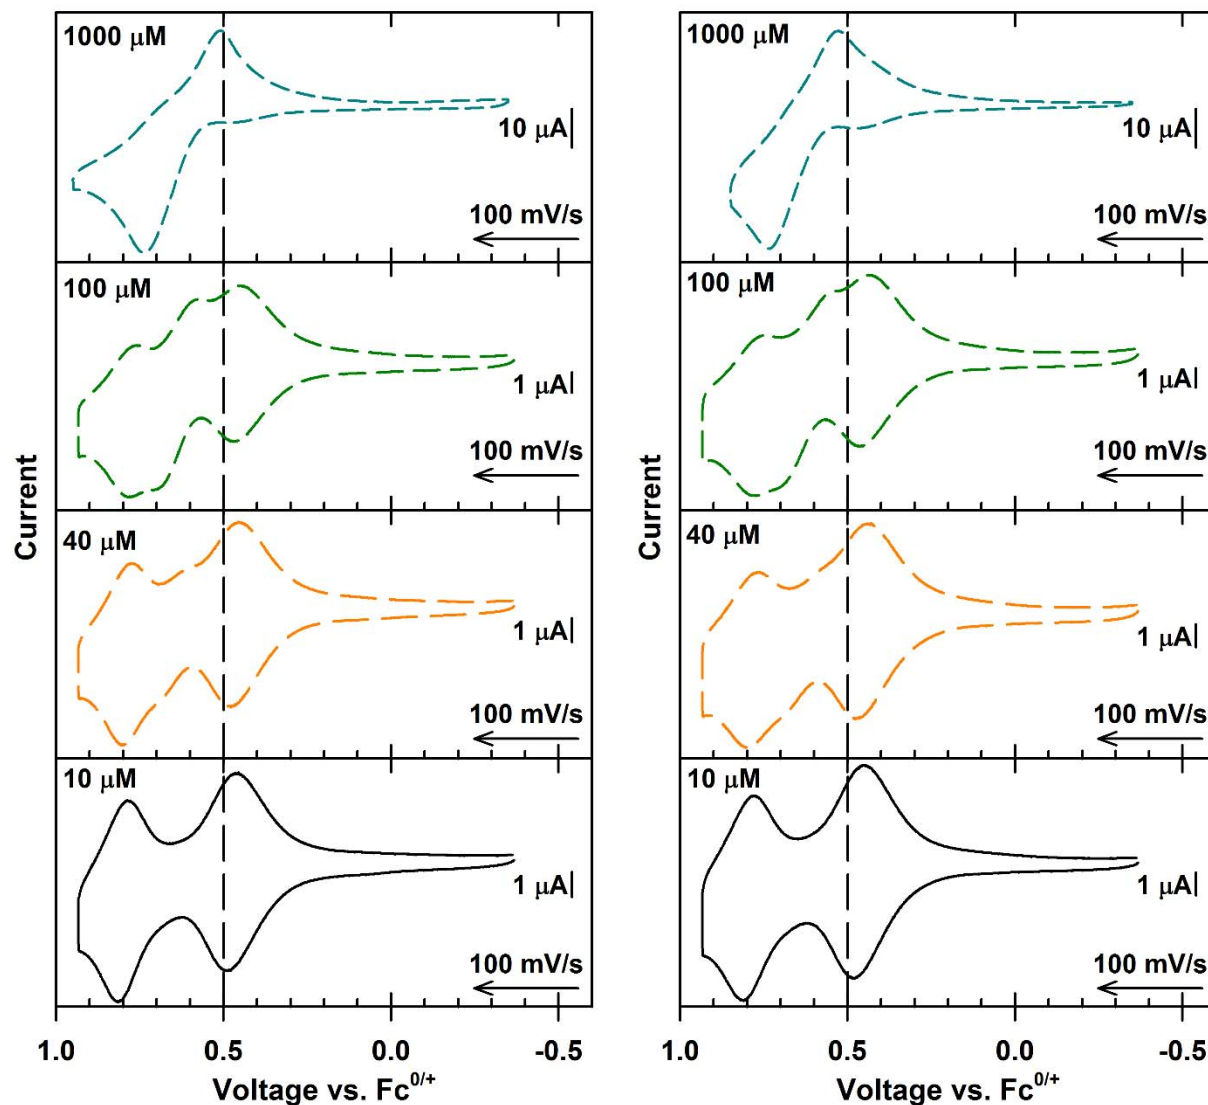

Figure S10. CVs of  $[\text{Fe}(\text{bpy})_3]^{2+}$  over a film of three (left) and four (right) layers of **ZnTPEP** on ITO. Black solid line, orange long dash, green medium dash, and cyan short dash are 10, 40, 100, and 1000  $\mu\text{M}$  respectively. The vertical dashed black line at 0.5 V corresponds to the midpoint potential of **ZnTPEP** $^{0/+}$ .

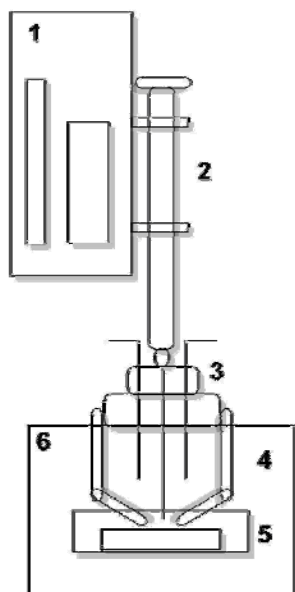

Figure S11. Schematic representation of wall-jet apparatus: 1) Syringe pump, 2) air-tight glass syringe, 3) Teflon cap, 4) Teflon cone, 5) electrode and 6) lexan cell holder.

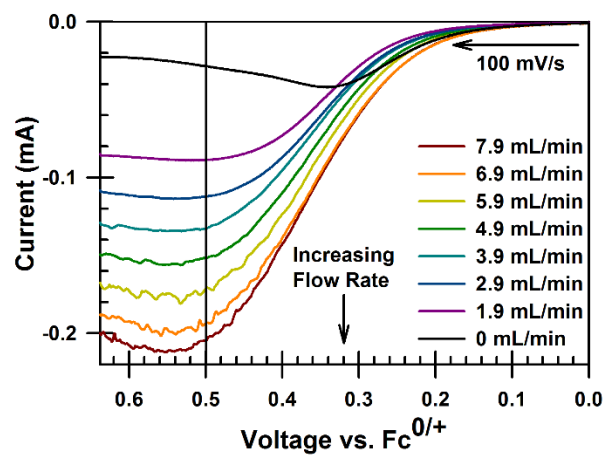

Figure S12. Linear sweep voltammograms of 1 mM  $\text{Co}(\text{bpy})_3^{2+}$  at varying flow rates. The solid black line at 0.5 V corresponds to the midpoint potential of  $\text{ZnTPEP}^{0/+}$ .

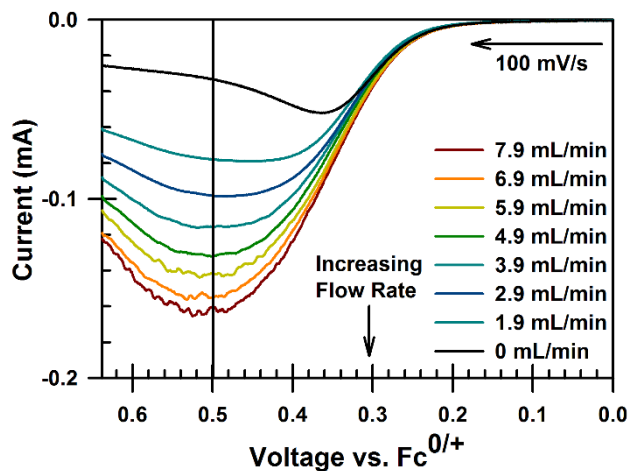

Figure S13. Linear sweep voltammograms of 1 mM  $\text{Co}(\text{NO}_2\text{-phen})_3^{2+}$  at varying flow rates. The solid black line at 0.5 V corresponds to the midpoint potential of  $\text{ZnTPEP}^{0/+}$ .

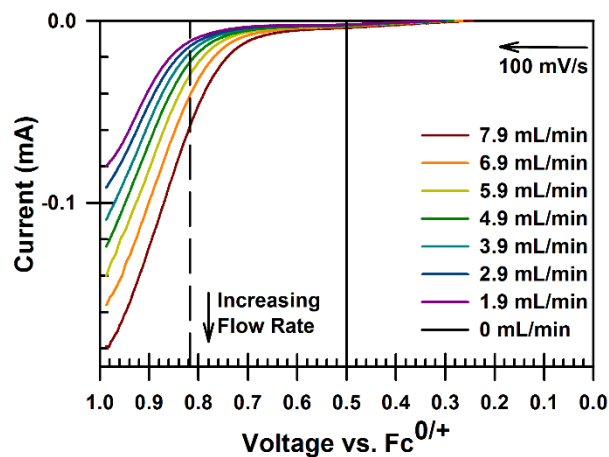

Figure S14. Linear sweep voltammograms of 1 mM  $\text{Fe}(\text{bpy})_3^{2+}$  at varying flow rates. The vertical solid and dashed black lines are located at the  $\text{ZnTPEP}^{0/+}$  and  $\text{ZnTPEP}^{+/2+}$  potentials, respectively.

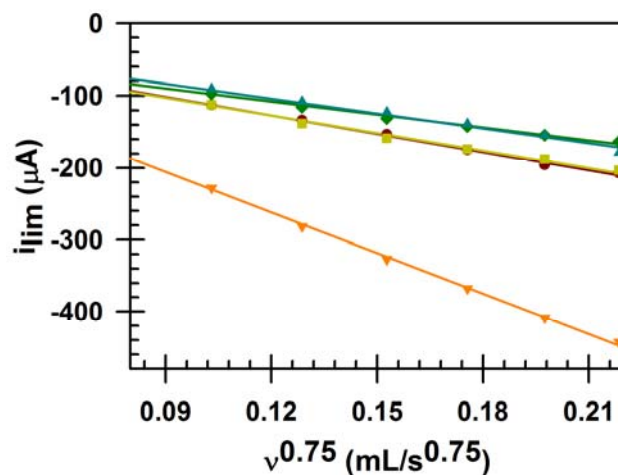

Figure S15. Levich analysis of each mediator: ferrocene is orange (down triangle); [Co(bpy)<sub>3</sub>]<sup>2+</sup>, red (circles); [Co(dmb)<sub>3</sub>]<sup>2+</sup>, yellow (squares); [Co(NO<sub>2</sub>-phen)<sub>3</sub>]<sup>2+</sup>, green (diamonds); and [Fe(bpy)<sub>3</sub>]<sup>2+</sup>, teal (upward triangle). Limiting current was taken at 0.50 V (ZnTPEP<sup>0/+</sup>) for all mediators except [Fe(bpy)<sub>3</sub>]<sup>2+</sup>, which was taken 0.99 V.

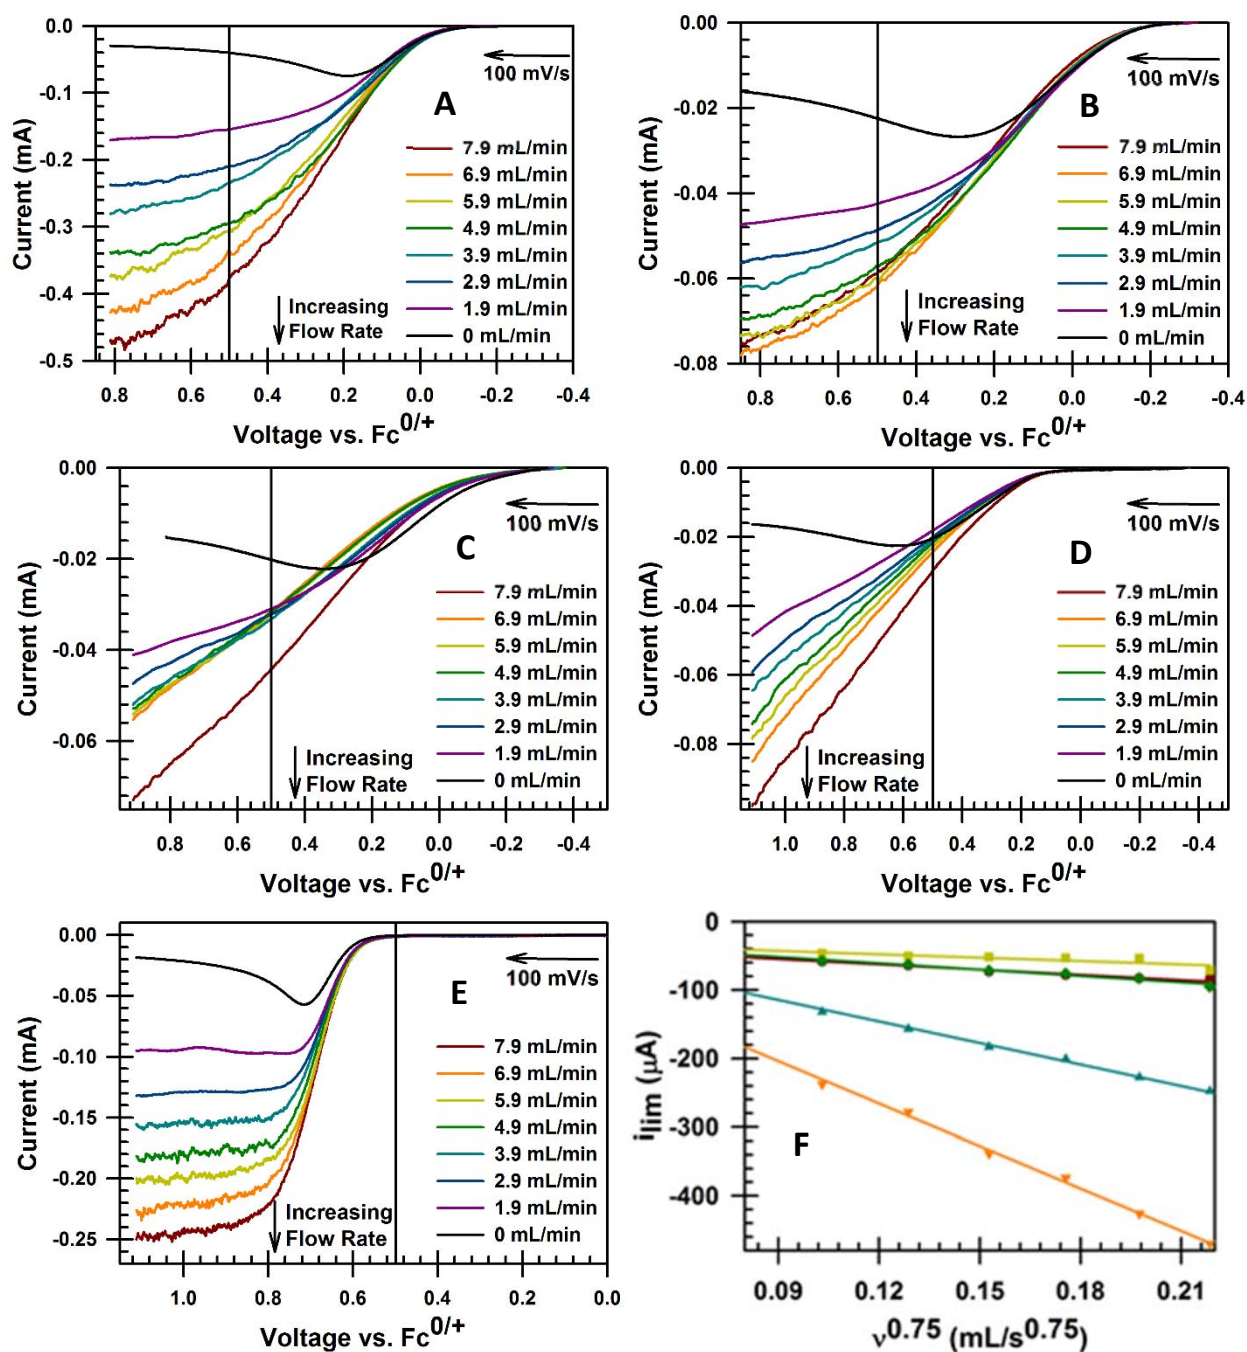

Figure S16. Plots A-E: Linear sweep voltammograms of 1 mM redox mediators at varying flow rates over ITO. The solid black line at 0.5 V corresponds to the midpoint potential of  $\text{ZnTPEP}^{0/+}$ . All mediators are 1 mM: (A) Fc, (B)  $[\text{Co}(\text{bpy})_3]^{2+}$ , (C)  $[\text{Co}(\text{dmb})_3]^{2+}$ , (D)  $[\text{Co}(\text{NO}_2\text{-phen})_3]^{2+}$ , and (E)  $[\text{Fe}(\text{bpy})_3]^{2+}$ . Plot F: Levich analysis of each mediator over ITO: ferrocene is orange (down triangle);  $[\text{Co}(\text{bpy})_3]^{2+}$ , red (circles);  $[\text{Co}(\text{dmb})_3]^{2+}$ , yellow (squares);  $[\text{Co}(\text{NO}_2\text{-phen})_3]^{2+}$ , green (diamonds); and  $[\text{Fe}(\text{bpy})_3]^{2+}$ , teal (upward triangle).
